# Supplementary material for: Male gametophyte-specific WRKY34 transcription factor mediates cold sensitivity of mature pollen in Arabidopsis
Source: PubMed Central journal article supplement — J Exp Bot. 2010 Jul 19;61(14):3901–14. doi: 10.1093/jxb/erq204 (PMC2935866; doi:10.1093/jxb/erq204), 2010-07-19
Supplement: supp_erq204_00047514-file002.pdf [file supp_erq204_00047514-file002.pdf]

**Title: Male gametophyte-specific WRKY34 transcription factor mediates cold sensitivity of mature pollen in *Arabidopsis***

Authors: Changsong Zou<sup>1,2</sup>, Wenbo Jiang<sup>1</sup> and Diqu Yu<sup>1,\*</sup>

**Supplementary Table S1. List of quantitative RT-PCR primer sequences**

| Gene Name | AGI       | Primer forward (5'->3')   | Primer reverse (5'->3')    |
|-----------|-----------|---------------------------|----------------------------|
| AGL65     | AT1G18750 | GAGCACAAGCAACAGGCAAG      | CGGTAGGGGAAAACATAAGAAGG    |
| AGL30     | AT2G03060 | CTCCTCCTCTTCTCTTACTCTTCC  | GGTTTGGTTGGTGGTTGTCGTT     |
| WRKY34    | AT4G26440 | GCACGCACCCGAATTGT         | CGGTTAGGTGGAGGTTTGCT       |
| AGL104    | AT1G22130 | ACTTTCCTGACCAGAATAGACG    | TCTGCCATTTGGAGTTGTTG       |
| AGL66     | AT1G77980 | CAGCAACTCAAGGCTGAGAA      | CACAAGTTTCGTACTCTTCCATTG   |
| AGL94     | AT1G69540 | ACAGTTGAGGTGCTTAGCGA      | AGTTGTTGCTGCTGACGTTG       |
| CBF2      | AT4G25470 | CTCACGACGTCGCCGCCATA      | GCTTCAGCCGCCGCCTTTTG       |
| CBF1      | AT4G25490 | TGAAGTGAGAGAGCCAAACAAGA   | CCGAGTCAGCGAAGTTGAGA       |
| CBF3      | AT4G25480 | GGCGGAACAGAGCGAAAA        | GGAAGCGGCAAAAGCATC         |
| ZAT6      | AT5G04340 | ATATCCGGTGGCGGGGGAGG      | TTGTGGCCGCCGAGAGCTTG       |
| T1B8.13   | AT2G33830 | CCTTGCCGCCTCCGCAATA       | TTCCAGGACTCCCGGCCACC       |
| MMI9.21   | AT5G62350 | GCCGTGACACTAAGCCGAGCC     | TGGCTTCGACCTCGCGCTTC       |
| Xero2     | AT3G50970 | GCTGCCAGGTCATCATGGTGCT    | GGCAGCTGCTCCATAACTTTTTCCGT |
| RD29A     | AT5G52310 | AGGTCAACGTCGAGACCCCG      | TCAGCAATCTCCGGTACTCCTCCA   |
| F16B3.11  | AT3G02480 | TGGACAACAAGCAAAACGCGAGCTA | CTGTCCATCATTCCACCGGCCTTC   |
| F3I6.3    | AT1G24110 | GCACGGTTACGGGTTGCTCCA     | AACGCCGTTTCGTCTCCTCCGC     |
| SRF5      | AT1G78980 | GGATCTGCGCAAGAGCTTCGTGT   | AGACATCACACGCGACGAAACA     |
| T19N8.6   | AT3G28770 | GAGAGAGCATCGGAGACTCGACTAA | GCCTCTTGATGCCTCTCCTTCGT    |
| ACT2      | AT3G18780 | TGTGCCAATCTACGAGGGTTT     | TTTCCCGCTCTGCTGTTGT        |

**Supplementary Table S2. Mircoarray data for expression of 147 mature pollen grains (MPG) specific genes.**

MPG-specific genes mean that their expression levels have at least 5-fold higher expression in MPG than in any of the non-pollen tissues, and at least 2-fold higher expression in MPG than in bicellular pollen (BCP). RNA was extracted from the mature pollen grain of wrky34-1 mutant and wild type plants with 48 hours at 4°C.

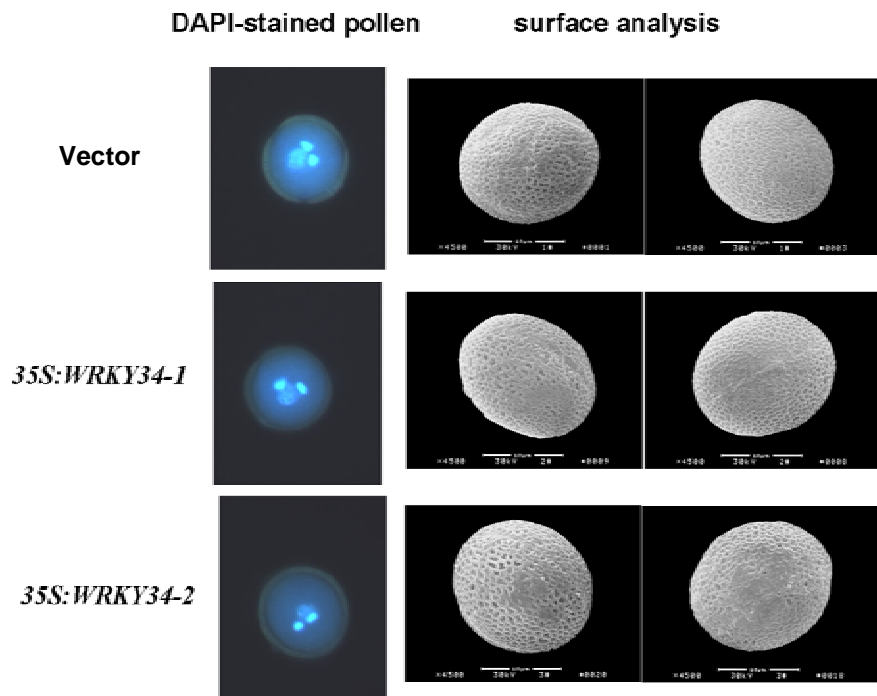

**Supplementary Fig. S1. Nuclear staining and pollen surface of vector and *35S:WRKY34* plants.**

Nuclear staining of wild type and *35S:WRKY34* plants by DAPI (left)

Pollen surface of wild type and *35S:WRKY34* plants by scanning electron microscopy (right)

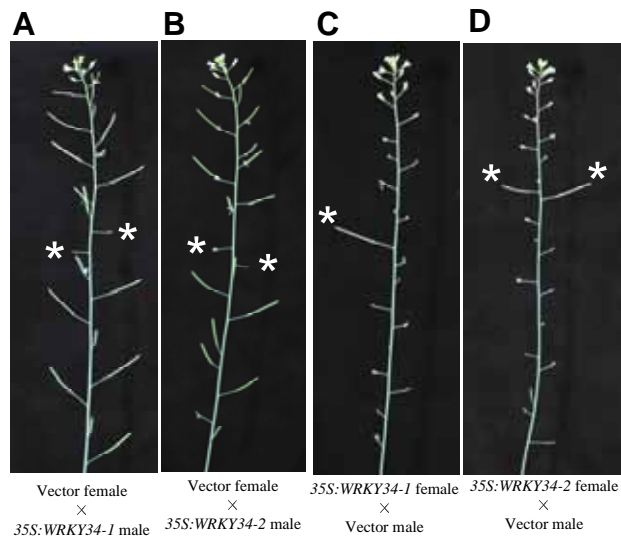

**Supplementary Fig. S2. Example of the reciprocal crosses between *35S::WRKY34* and vector plants.**

A and B, Wild-type plants (maternal parent) used in crosses with *35S::WRKY34* plants (paternal parent). C and D, *35S::WRKY34* plants (maternal parent) used in crosses with the WT (paternal parent). The crosses position is shown by asterisks.

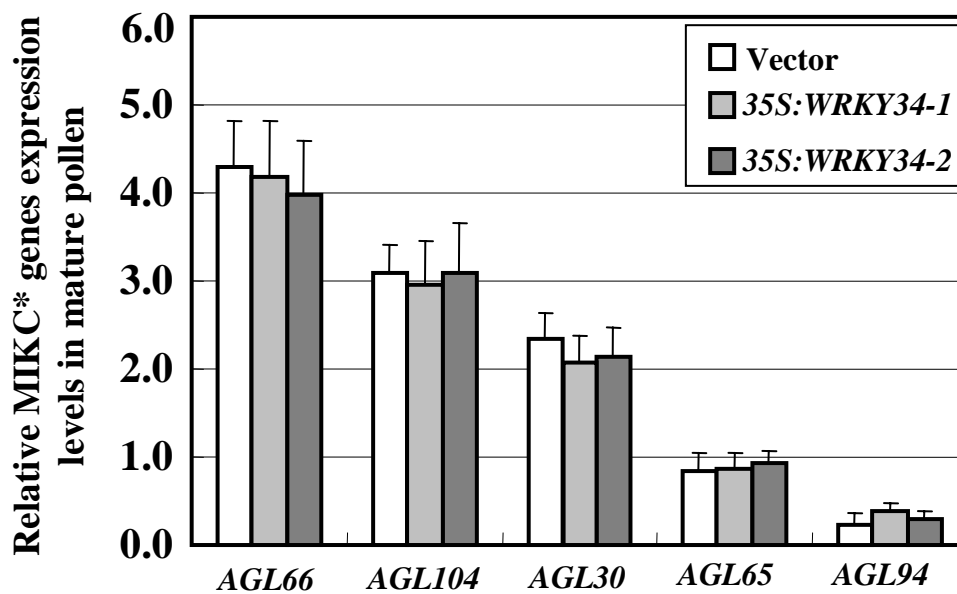

**Supplementary Fig. S3.** Levels of MIKC\* RNA in mature pollen of vector and *35S:WRKY34* plants.

Relative RNA levels were analyzed using gene-specific primers by real-time PCR. Three independent experiments are shown by re-extracting RNA from the vector and *35S:WRKY34* plants samples. Each experiment was repeated three times. Error bars indicate standard deviations of three independent biological samples.

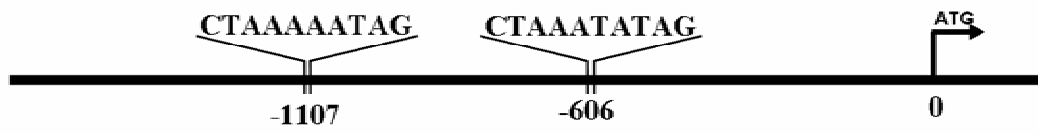

**Supplementary Fig. S4. Positions of two MEF2 motifs in the putative promoter of WRKY34.**

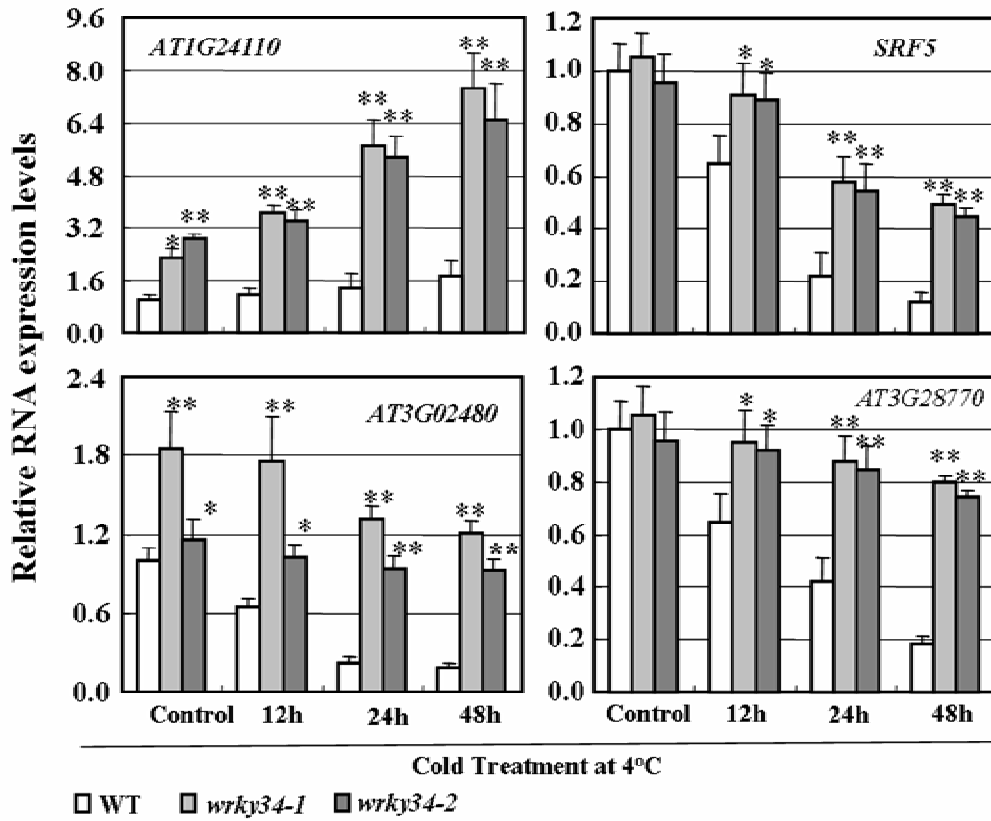

**Supplementary Fig. S5. RNA levels of mature pollen specific genes after cold stress.**

RNA was extracted from mature pollen treated with 4°C for 12 h, 24 h or 48 h at the end of cold-stress treatment and from the unstressed control. Relative RNA levels were analyzed using gene-specific primers by real-time PCR. Three independent experiments are shown by re-extracting RNA from different samples. Each experiment was repeated three times. Error bars indicate standard deviations of three independent biological samples. Differences between the wild-type (WT) and *wrky34* mutants after cold stress are significant at the  $0.05 > P > 0.01$  (\*) or  $P < 0.01$  (\*\*)
